# Supplementary material
Source: Research Square preprint supplement (doi:10.21203/rs.3.rs-9936103/v1)

Supplementary material of the article “Evidence of expanding range of *Culex perexiguus* in Northern Italy (Emilia-Romagna, 2025)”

Table S1. Mosquitoes of the *Culex* genus collected in the frame of the surveillance provided by the Arbovirus Regional Plan (2009-2025), with reference to the number of traps in which the species was collected (trap+).

|  |  | *Cx. pipiens* | | *Cx. modestus* | | *Cx. perexiguus* | |
| --- | --- | --- | --- | --- | --- | --- | --- |
| year | Active traps | trap+ | total | trap+ | total | trap+ | total |
| 2009 | 64 | 64 | 93352 | 10 | 198 |  |  |
| 2010 | 109 | 109 | 365655 | 11 | 1103 |  |  |
| 2011 | 100 | 100 | 210007 | 9 | 196 |  |  |
| 2012 | 96 | 96 | 190830 | 10 | 921 |  |  |
| 2013 | 88 | 88 | 384841 | 28 | 1347 |  |  |
| 2014 | 88 | 88 | 300599 | 27 | 931 |  |  |
| 2015 | 88 | 88 | 209877 | 21 | 518 |  |  |
| 2016 | 93 | 93 | 225034 | 14 | 78 |  |  |
| 2017 | 94 | 94 | 134078 | 9 | 67 |  |  |
| 2018 | 95 | 95 | 220255 | 6 | 35 |  |  |
| 2019 | 95 | 95 | 334745 | 7 | 17 |  |  |
| 2020 | 95 | 95 | 136514 | 5 | 19 |  |  |
| 2021 | 95 | 95 | 153412 | 2 | 17 |  |  |
| 2022 | 95 | 95 | 129158 | 2 | 31 |  |  |
| 2023 | 98 | 98 | 437352 | 1 | 2 |  |  |
| 2024 | 98 | 98 | 214896 |  |  |  |  |
| 2025 | 98 | 98 | 204209 |  |  | 22 | 83 |

Table S2. Details of collections of *Cx. perexiguus* in 2025

| Data | Site Code | y | x | Municipality | Province | Number |
| --- | --- | --- | --- | --- | --- | --- |
| 02/09/25 | IZ10 | 44.483289 | 11.782586 | Imola | BO | 1 |
| 10/09/25 | BONORD02 | 44.791275 | 11.222661 | Crevalcore | BO | 1 |
| 16/09/25 | WN097B | 44.569398 | 11.656189 | Molinella | BO | 6 |
| 16/09/25 | WN096A | 44.5658 | 11.578043 | Budrio | BO | 1 |
| 17/09/25 | WN043A | 44.88833 | 11.18042 | Mirandola | MO | 1 |
| 17/09/25 | WN043A | 44.88833 | 11.18042 | Mirandola | MO | 1 |
| 18/09/25 | IZ09 | 44.18391 | 12.086585 | Forlì | FC | 1 |
| 18/09/25 | IZ10 | 44.483289 | 11.782586 | Imola | BO | 8 |
| 18/09/25 | WN121B | 44.421038 | 11.800845 | Mordano | BO | 3 |
| 23/09/25 | WN107B | 44.543023 | 11.285503 | Bologna | BO | 1 |
| 23/09/25 | BONORD07 | 44.610226 | 11.256873 | Sala Bolognese | BO | 1 |
| 23/09/25 | WN027A | 44.96634 | 11.83465 | Riva del Po | FE | 3 |
| 23/09/25 | WN028A | 44.981758 | 11.955296 | Riva del Po | FE | 3 |
| 23/09/25 | WN049A | 44.88017 | 11.98409 | Jolanda di Savoia | FE | 2 |
| 24/09/25 | WN040A | 44.857938 | 10.809916 | Fabbrico | RE | 1 |
| 25/09/25 | WN066A | 44.76037 | 11.84285 | Ostellato | FE | 1 |
| 25/09/25 | WN067B | 44.74289 | 11.95396 | Ostellato | FE | 3 |
| 25/09/25 | WN129B | 44.284025 | 12.266814 | Ravenna | RA | 1 |
| 30/09/25 | IZ10 | 44.483289 | 11.782586 | Imola | BO | 18 |
| 30/09/25 | WN121B | 44.421038 | 11.800845 | Mordano | BO | 3 |
| 30/09/25 | WN096A | 44.5658 | 11.578043 | Budrio | BO | 1 |
| 30/09/25 | WN097B | 44.569398 | 11.656189 | Molinella | BO | 1 |
| 30/09/25 | BONORD14 | 44.686974 | 11.413351 | San Pietro in Casale | BO | 5 |
| 30/09/25 | WN096A | 44.5658 | 11.578043 | Budrio | BO | 1 |
| 01/10/25 | WN041A | 44.88117 | 10.90093 | Novi di Modena | MO | 1 |
| 03/10/25 | WN099A | 44.58186 | 11.89251 | Argenta | FE | 1 |
| 03/10/25 | WN101A | 44.55169 | 12.13867 | Argenta | FE | 1 |
| 03/10/25 | WN085A | 44.64625 | 11.87937 | Argenta | FE | 4 |
| 07/10/25 | WN048A | 44.88645 | 11.82766 | Copparo | FE | 1 |
| 08/10/25 | WN040A | 44.857938 | 10.809916 | Fabbrico | RE | 1 |
| 14/10/25 | IZ10 | 44.483289 | 11.782586 | Imola | BO | 6 |
|  |  |  |  |  |  | 83 |

Table S3. List of screened covariates (Cov.) with reference to those selected (Se.) for implementing the models.

| Variable | Source | Time | Cov | Se |
| --- | --- | --- | --- | --- |
| Monthly anomaly t (min, max and mean) | obtained from ERG5 | 2024-2025 | 36 | 24 |
| Monthly anomaly precipitation | obtained from ERG5 | 2024-2025 | 12 | 9 |
| Bioclimatic indexes* | obtained from ERG5 | 2024-2025 | 19 | 13 |
| Corine land cover (CLC) | https://land.copernicus.eu/ | 2018 | 1 | 1 |
| Proximity to CLC4 (wethland) | obtained from CLC | 2018 | 1 | 1 |
| Proximity to CLC213 (ricefield) | obtained from CLC | 2018 | 1 | 1 |
| Soil suborders (USDA) | ISRIC 1 km2 grid www.isric.org | 2018 | 1 | 1 |
| Slope (Globe DEM) | www.ngdc.noaa.gov/mgg/topo/globe.html | 2011 | 1 | 1 |
| Proximity to Water bodies < 1 km2 | obtained from EU-Hydro, Openstreetmap.org | 2018 | 1 | 1 |
| Proximity to rivers | obtained from https://gn.mase.gov.it/portale/home | 2018 | 1 | 1 |
| Tree cover density | https://land.copernicus.eu/en | 2018 | 1 | 1 |
|  |  |  | 75 | 54 |

*BIO1 = Annual Mean Temperature, BIO2 = Mean Diurnal Range (Mean of monthly (max temp - min temp)), BIO3 = Isothermality (BIO2/BIO7) (×100), BIO4 = Temperature Seasonality (standard deviation ×100), BIO5 = Max Temperature of Warmest Month, BIO6 = Min Temperature of Coldest Month, BIO7 = Temperature Annual Range (BIO5-BIO6), BIO8 = Mean Temperature of Wettest Quarter, BIO9 = Mean Temperature of Driest Quarter, BIO10 = Mean Temperature of Warmest Quarter, BIO11 = Mean Temperature of Coldest Quarter, BIO12 = Annual Precipitation, BIO13 = Precipitation of Wettest Month, BIO14 = Precipitation of Driest Month, BIO15 = Precipitation Seasonality (Coefficient of Variation), BIO16 = Precipitation of Wettest Quarter, BIO17 = Precipitation of Driest Quarter, BIO18 = Precipitation of Warmest Quarter, BIO19 = Precipitation of Coldest Quarter

Table S4 Estimates of relative contributions of the environmental variables to the Maxent model

| Variable | Percent contribution | Permutation importance |
| --- | --- | --- |
| soli_usda | 35 | 1 |
| prox_clc4 | 15.5 | 34.1 |
| clc2018 | 12.2 | 3.5 |
| inland_osm_proximity | 10.8 | 4.9 |
| tree_cp_2015 | 4.9 | 3.2 |
| slope | 4.6 | 0.7 |
| DAILYPREC_8_2025_1km | 4.4 | 26.7 |
| ricef_proximity | 3.2 | 3 |
| DAILYPREC_9_2025_1km | 2 | 4.9 |
| DAILYTMAX_10_2025_1km | 1.7 | 4 |
| proxy_rivers | 0.8 | 4.7 |
| bio_2025_7_1km | 0.7 | 2.1 |
| DAILYTMAX_11_2024_1km | 0.6 | 0.2 |
| DAILYTAVG_5_2025_1km | 0.6 | 1.1 |
| DAILYTAVG_10_2025_1km | 0.4 | 0 |
| bio_2025_9_1km | 0.4 | 0.3 |
| DAILYPREC_11_2024_1km | 0.4 | 0.8 |
| bio_2025_13_1km | 0.3 | 1.9 |
| DAILYTMAX_8_2025_1km | 0.2 | 0.7 |
| DAILYTAVG_7_2025_1km | 0.2 | 0.3 |
| DAILYTMAX_7_2025_1km | 0.2 | 0.1 |
| DAILYPREC_7_2025_1km | 0.2 | 0.2 |
| bio_2025_4_1km | 0.1 | 0 |
| DAILYPREC_1_2025_1km | 0.1 | 0.2 |
| DAILYTMAX_4_2025_1km | 0.1 | 0.5 |
| bio_2025_5_1km | 0.1 | 0.4 |
| bio_2025_18_1km | 0.1 | 0.4 |

Figure S1. Response curves four variables with highest percent contribution to the model, showing how each environmental variable affects the Maxent prediction.


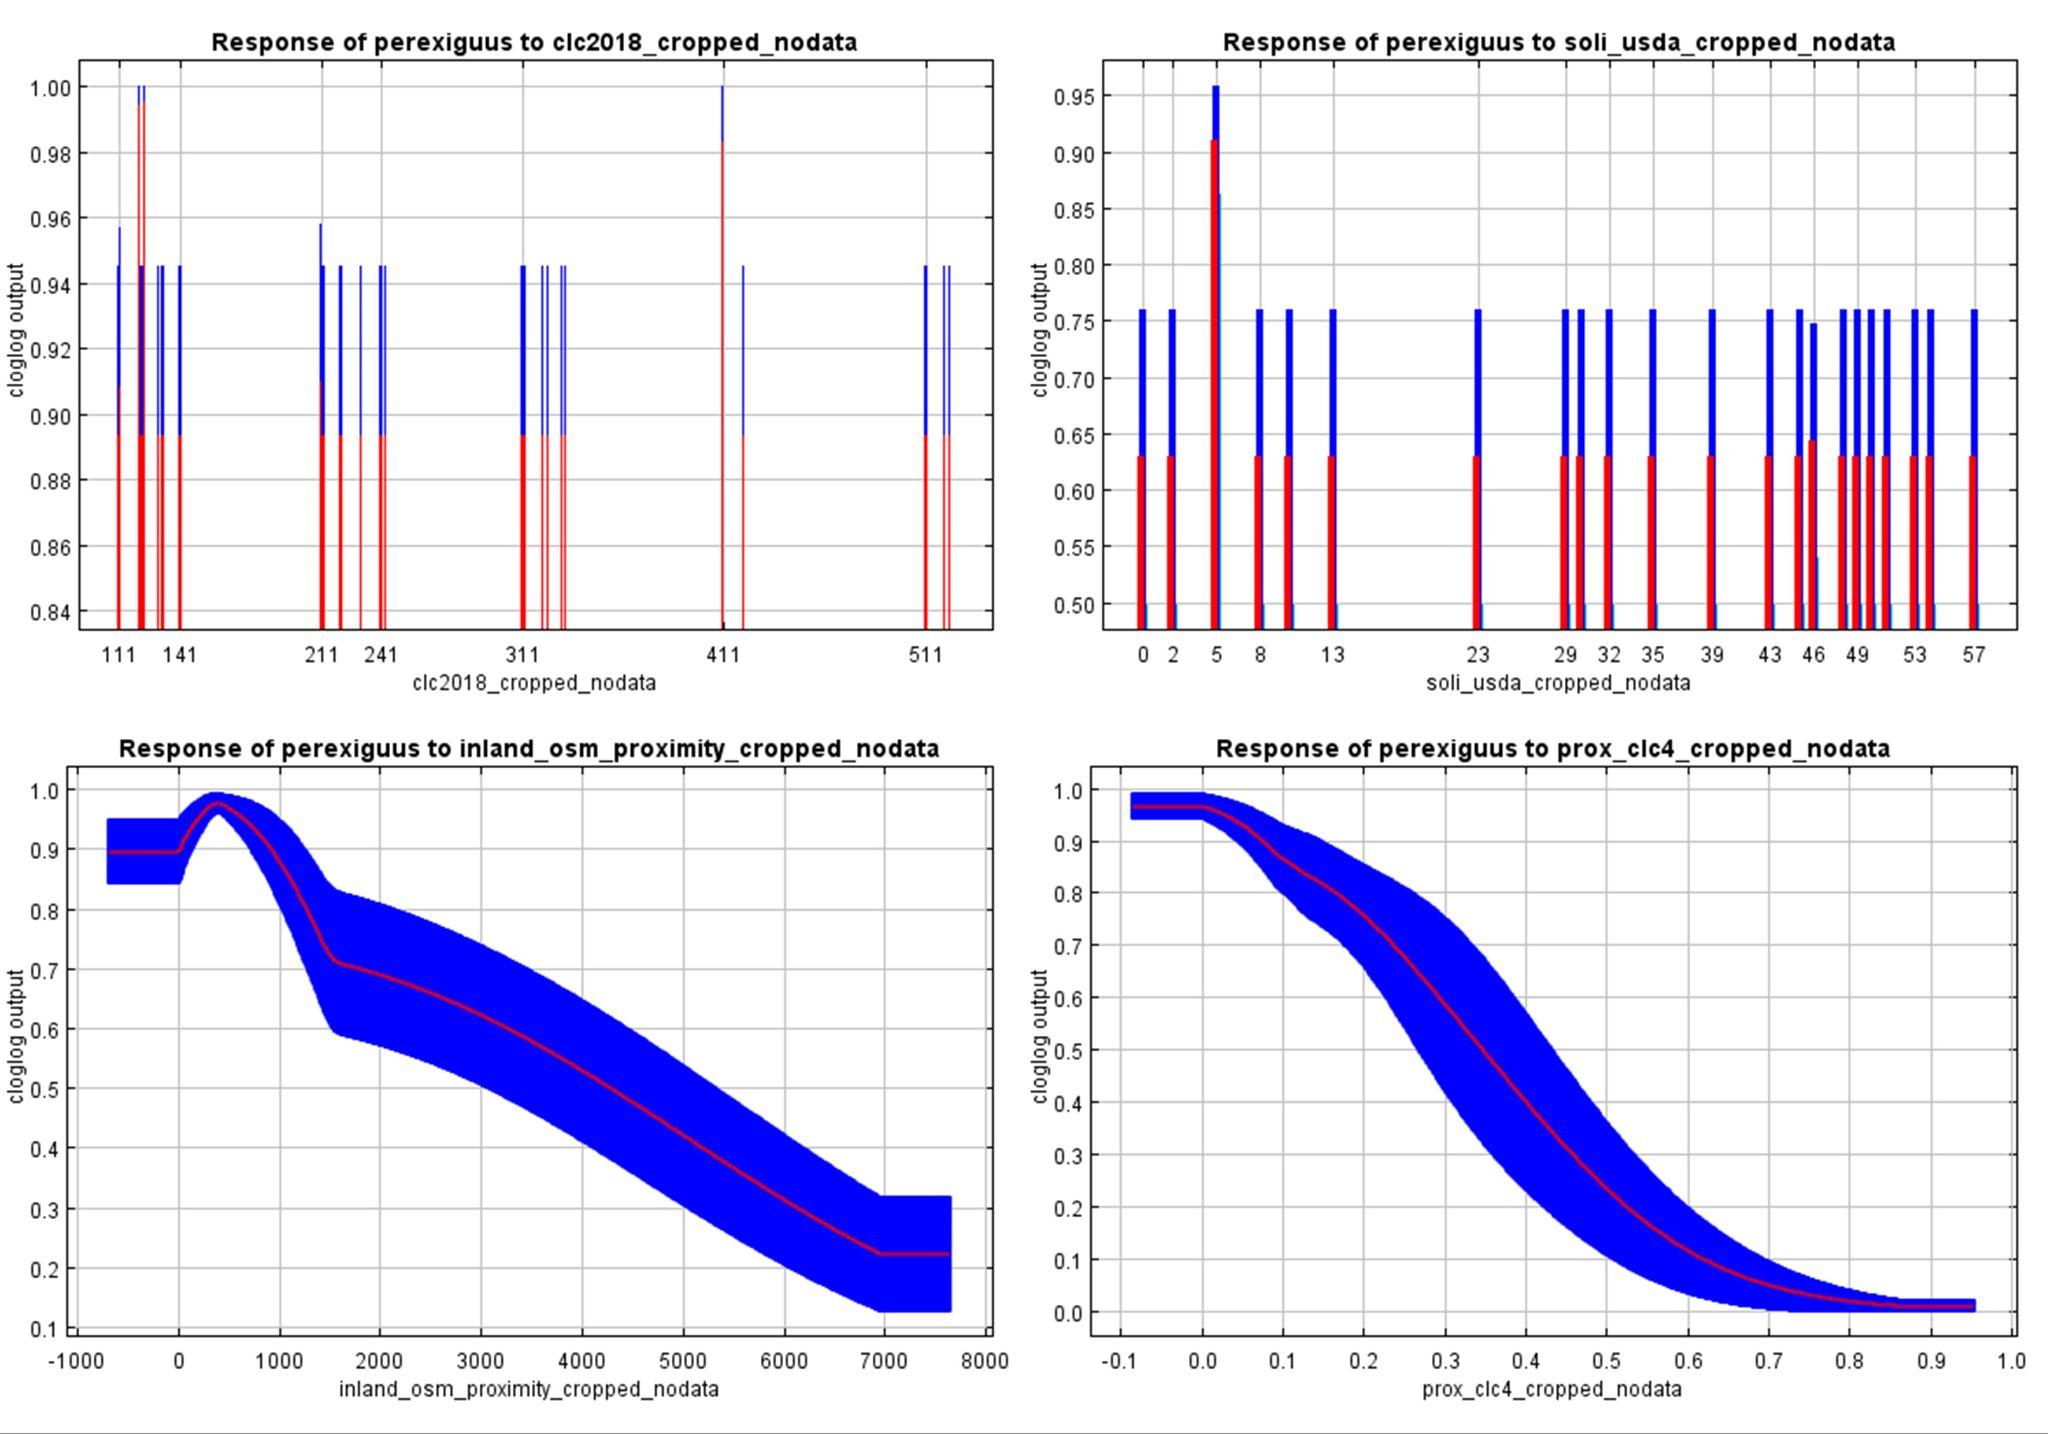

Supplement: Supplementary file 1 [file 5e0203e22239252c4a0340be.docx]
